# Supplementary figures and images for: Population-Based Survival Analysis of Stage IVB Small-Cell Neuroendocrine Carcinoma in Comparison to Major Histological Subtypes of Cervical Cancer
Source: MDPI journal article supplement (doi:10.3390/curroncol30110682), 2023-10-24

Supplemental Figure S1

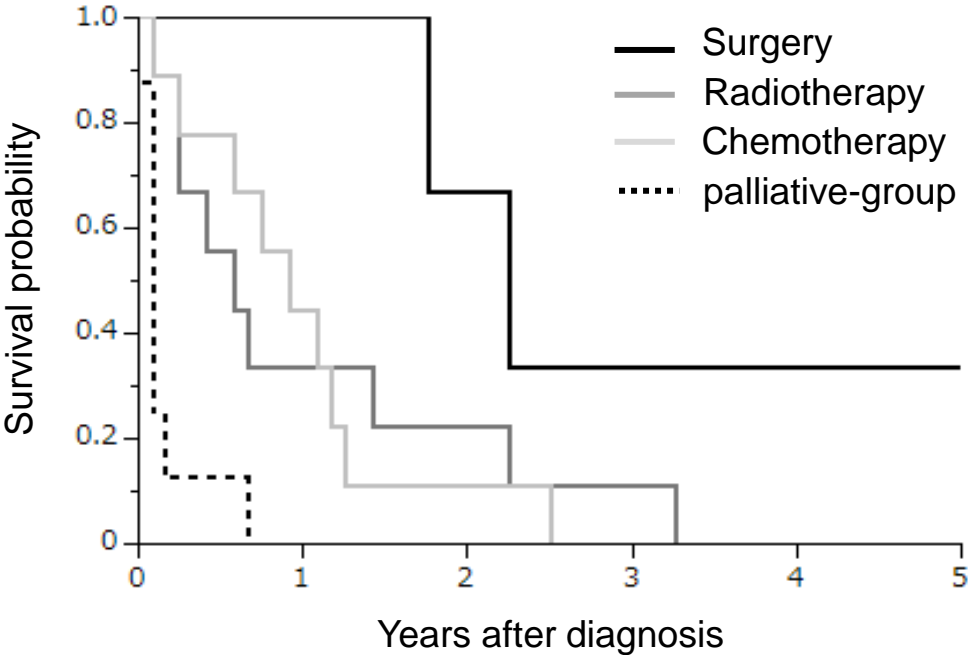

Supplement: s1 [file s1]
